# Supplementary material for: Long valley lifetime of dark excitons in single-layer WSe2
Source: PubMed Central journal article supplement (PMC6731252; doi:10.1038/s41467-019-12129-1), 2019-09-06
Supplement: 41467_2019_12129_MOESM1_ESM.pdf [file 41467_2019_12129_MOESM1_ESM.pdf]

1 **Supplementary Information for**  
2 **Long valley lifetime of dark excitons in single-layer WSe<sub>2</sub>**

3  
4 Tang et al.  
5  
6  
7  
8  
9  
10  
11  
12  
13  
14  
15  
16  
17  
18  
19  
20  
21  
22  
23  
24  
25  
26  
27  
28  
29  
30  
31  
32  
33  
34

## 35 **Supplementary Note 1: Steady-state PL for dark excitons under a magnetic field**

36 The photoluminescence (PL) spectrum of the out-of-plane (OP) channel was measured  
37 for both neutral and doped WSe<sub>2</sub> as a function of OP magnetic field. Both the left- and right-  
38 circularly-polarized (LCP and RCP) excitations above the bright exciton fundamental resonance  
39 have been used. We fit each PL spectrum using a superposition of two Gaussians and a  
40 background (Supplementary Fig. 1-3 for three different types of dark excitons). A substantial  
41 Zeeman splitting is observed for the dark hole trion, electron trion, and neutral exciton in  
42 Supplementary Fig. 4 – 6, respectively. The g-factor is determined to be  $10.9 \pm 0.1$ ,  $10.2 \pm 0.3$ ,  
43 and  $10.8 \pm 0.5$  accordingly. The g-factor of the neutral dark exciton is slightly higher than the  
44 previously reported values ( $9.16$  by Metteo Barbone et al.<sup>1</sup>,  $9.4$  by C. Robert et al.<sup>2</sup>, and  $9.75$  by  
45 Li, Z. et al.<sup>3</sup>).

46 We also estimate the valley contrast  $\rho \approx \frac{I_{K'} - I_K}{I_{K'} + I_K}$  from the integrated intensity of the two  
47 Gaussian peaks  $I_{K(K')}$ . The valley contrast is evaluated to be  $0.54 \pm 0.05$  and  $-0.44 \pm 0.06$  for the  
48 dark hole trion measured with the RCP and LCP excitation, respectively (Supplementary Fig. 1).  
49 A similar analysis has been carried out for the dark electron trion (Supplementary Fig. 2) and a  
50 valley contrast of  $0.46 \pm 0.09$  and  $-0.68 \pm 0.12$  is obtained using the RCP and LCP excitation,  
51 respectively. In contrast, the valley contrast for dark neutral exciton (Supplementary Fig. 3) is  
52  $-0.35 \pm 0.05$  and  $-0.58 \pm 0.08$ , without any sign change, suggesting short valley lifetimes, and the  
53 valley polarization, due to thermalization of the valley states under an OP magnetic field. All  
54 errors of the valley contrast represent the fitting error.

55 In order to determine the valley state of the dark excitons, we measure the PL of the  
56 bright excitons through the in-plane (IP) channel under the same experimental conditions and  
57 rely on the valley optical selection rules that apply to the bright excitons. One example is shown  
58 in Supplementary Fig. 7 for an electron-doped WSe<sub>2</sub> sample (both gates at 0 V) under 8 T. We  
59 observe that the LCP and RCP excitations (that couple exclusively to the K and K' valleys)  
60 address the *lower-* and *higher-energy* Zeeman-split states of the bright electron trion,  
61 respectively. This is the same order for  $X^{-,D}$  and  $X^{0,D}$  shown in Figure 3 of the main text.  
62 Accordingly, we assign the brighter Zeeman-split peak of the dark excitons with the LCP and  
63 RCP excitation to the K and K' valleys, respectively. The order is reversed for  $X^{+,D}$ .

64

## 65 **Supplementary Note 2: PL dynamics of excitons**

66 The time-resolved PL at different energies of both the IP and OP channels has been  
67 measured under zero magnetic field using the time-correlated single-photon-counting method.  
68 Supplementary Supplementary Figure shows the time-resolved PL monitored at the peak energy  
69 of the bright exciton  $X^{0,B}$  and the bright trion  $X^{+,B}$  together with the instrument response function  
70 (IRF). They show a fast rise and a slow decay. The decay of the bright exciton and trion is only  
71 slightly slower than the IRF. The results from the OP and IP channels are also nearly identical  
72 except the PL intensity (not shown).

73 On the other hand, the dark trion shows a substantially longer decay time.  
74 Supplementary Supplementary Figure shows the time-resolved PL at the dark hole trion energy  
75 from the IP and OP channels. The traces have been deconvoluted with the measured IRF. The  
76 two channels differ significantly for the first 3.5 ns, with a much slower decay for the OP

77 channel, and become similar gradually afterwards. The latter can be attributed to the  
78 contribution of the localized excitons with very long population lifetimes. The localized excitons  
79 presumably do not have a well-defined emission dipole direction. The PL dynamics of OP  
80 channel can be well described by a three-exponential fit (see details in Supplementary Note 3).  
81 The PL is initially dominated by a fast component with a decay time of  $1.3 \pm 0.1$  ns. The PL also  
82 contains a second component (about 10%) with a longer decay time (a few ns) and a third even  
83 smaller component that does not decay over the experimental time window (a few ns). The latter  
84 presumably arises from localized excitons. We have limited the analysis temporal window to the  
85 initial a few ns in the main text when PL from free dark exciton dominates.

86

### 87 **Supplementary Note 3: Analysis of the PL and valley dynamics with repetitive pulse** 88 **excitation**

89 If  $I(t)$  is the time-resolved PL intensity under single pulse excitation, the PL dynamics  
90 under repetitive excitation with period  $t_0$  can be expressed as  $\bar{I}(t) = I(t) + I(t + t_0) +$   
91  $I(t + 2t_0) + \dots$ . Here we have assumed that the decay dynamics is unchanged for different  
92 excitation pulses. In the case of three-component analysis, we describe the PL intensity as the  
93 sum of three independent exponential functions

94

$$95 \quad I(t) = \sum_{i=1}^3 A_i \exp(-t/t_i), \quad (1)$$

96

97 where  $A_i$  and  $t_i$  ( $i = 1, 2, 3$ ) denote, respectively, the magnitude and decay time constant of the  
98 three components ( $t_1 < t_2 < t_3$ ). Under a repetitive excitation with period  $t_0$ , we modify Eq. 1  
99 to be

$$100 \quad \bar{I}(t) = \sum_{i=1}^3 A_i \exp(-t/t_i) [1 + \exp(-t_0/t_i) + \exp(-2t_0/t_i) + \dots]$$

$$101 \quad = \sum_{i=1}^3 \bar{A}_i \exp(-t/t_i), \quad (2)$$

102

103 where  $\bar{A}_i = A_i (1 - \exp(-t_0/t_i))^{-1}$ . We fit experimental PL dynamics with Eq. 2, and then  
104 reconstruct the PL dynamics for single pulse excitation (Eq. 1). The valley dynamics is  
105 calculated as  $\rho(t) \approx \frac{I_{K'}(t) - I_K(t)}{I_{K'}(t) + I_K(t)}$ , where  $I_{K'(K)}(t)$  is the reconstructed PL dynamics.

106

107 We show this analysis for the dark hole trion in Supplementary Fig. 10. The three-  
108 component model describes well the PL dynamics under different conditions (Supplementary Fig.  
109 10a, b, d, e). There is negligible decay of the valley polarization for the first 3.5 ns, in which the  
110 signal-to-noise ratio is still high (Supplementary Fig. 10c, f). We are thus confident that the  
111 valley lifetime exceeds several ns as stated in the main text.

112

### 112 **Supplementary Note 4: Alternative method for measuring the valley dynamics**

113 In the Fig. 4 of the main text, we have analyzed the valley dynamics of the dark hole trion  
114 by comparing the time-resolved PL at the energy of the K and K' valleys for a given circularly  
115 polarized excitation. Alternatively, we can analyze the valley dynamics by comparing the time-  
116 resolved PL at a given valley under the RCP and LCP excitations. These two analysis methods,

117 under most circumstances, are equivalent. Both have been widely applied in measuring the spin  
 118 lifetimes in the literature for GaAs quantum wells<sup>4-7</sup>. An example is shown in Supplementary  
 119 Fig. 11, where the valley lifetime of the dark hole trion is determined using the second method.  
 120 A similar valley lifetime is obtained as in the main text (using the first method). In practice, the  
 121 second method is more advantageous, since it only involves the rotation of a waveplate to switch  
 122 between the LCP and RCP excitation, instead of a monochromator to detect the lower- or higher-  
 123 energy Zeeman-split states.

124

## 125 **Supplementary Note 5: Valley dynamics of the dark electron trion**

126 Supplementary Figure 12a shows the time-resolved PL at the lower-energy Zeeman-split  
 127 state of the dark electron trion for the LCP and RCP excitation. We limit the time window to the  
 128 first 1.5 ns, in which the signal-to-noise ratio of each PL measurement is at least 5.  
 129 Supplementary Fig. 12b shows the degree of valley polarization evaluated using the second  
 130 method discussed above in Supplementary Note 4. A single exponential fit yields a valley  
 131 lifetime for the dark electron trion to be  $3.5 \pm 0.5$  ns. To guide the eye, in Supplementary Fig. 12  
 132 we have also included a three-component fit function for the PL dynamics and the valley  
 133 dynamics evaluated from the fit functions.

134

## 135 **Supplementary Figures**

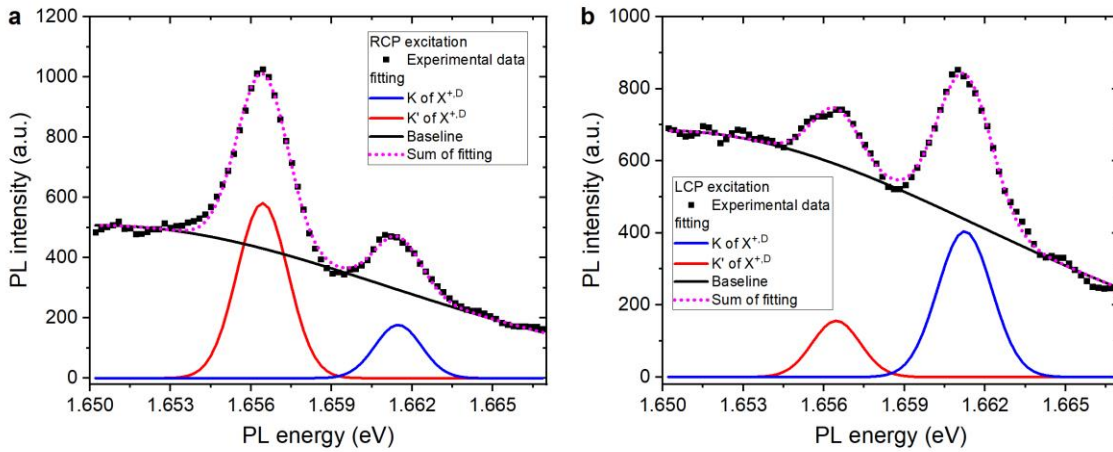

136

137

138 **Supplementary Figure 1 | Analysis of the PL spectrum under a magnetic field (hole-doped**  
 139 **sample).** A hole-doped WSe<sub>2</sub> sample (both gates at  $-2.2$  V) is excited by the RCP (a) and LCP  
 140 (b) excitation under 7.8 T. Each PL spectrum (black symbols) is decomposed into two  
 141 Gaussians (blue and red curves) and a background (black line, a Gaussian peak with peak  
 142 position away from  $X^{+,D}$ ). The dotted magenta curves are the sum of all contributions. The  
 143 valley contrast, estimated from the integrated emission of the two peaks by  $\frac{I_{K'} - I_K}{I_{K'} + I_K}$ , is  $0.53 \pm 0.05$   
 144 for a and  $-0.44 \pm 0.06$  for b. The errors represent fitting errors.

145

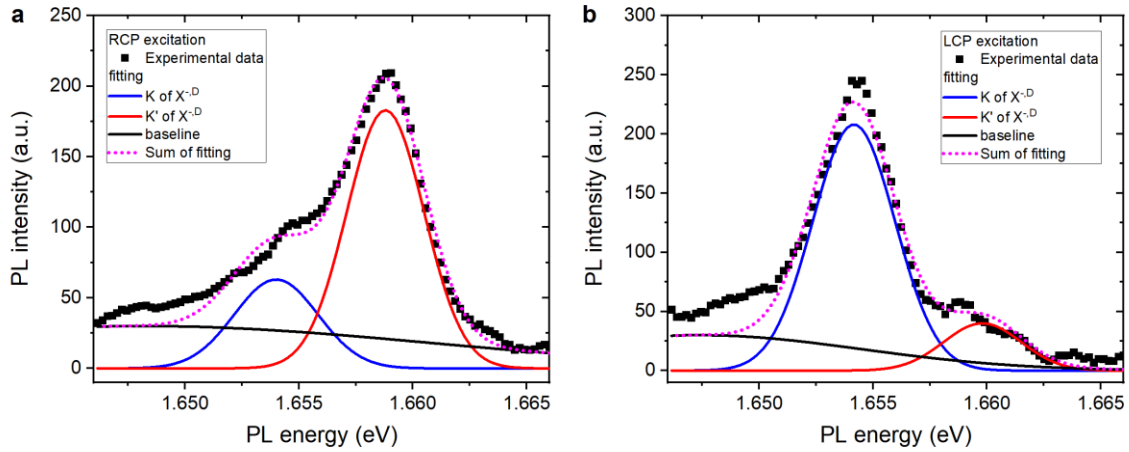

146  
 147  
 148  
 149  
 150  
 151  
 152

**Supplementary Figure 2 | Analysis of the PL spectrum under a magnetic field (electron-doped sample).** Same as Supplementary Fig. 1 but for an electron-doped WSe<sub>2</sub> sample (both gates at -0.5 V). The valley contrast is estimated to be  $0.49 \pm 0.09$  for **a** and  $-0.68 \pm 0.12$  for **b**.

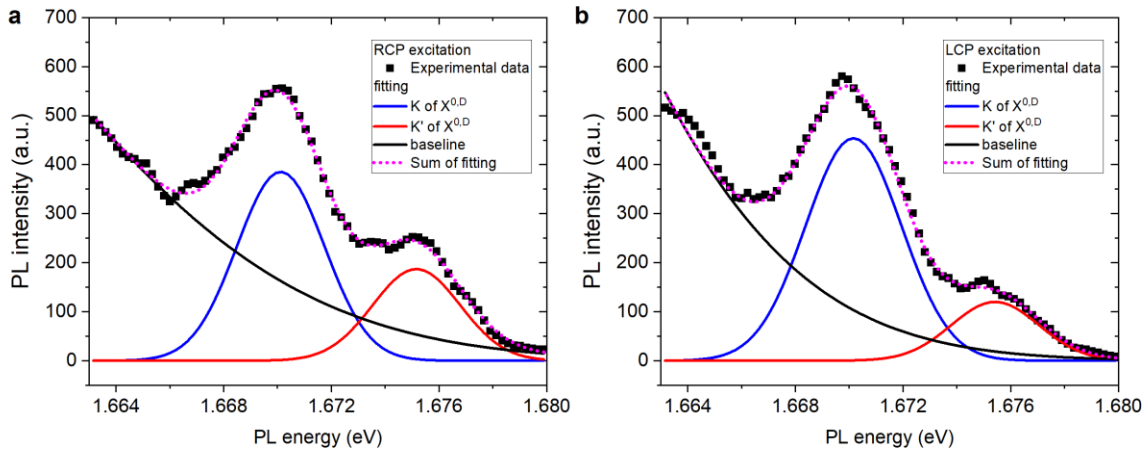

153  
 154  
 155  
 156  
 157

**Supplementary Figure 3 | Analysis of the PL spectrum under a magnetic field (neutral sample).** Similar to Supplementary Fig. 1 but for a neutral WSe<sub>2</sub> sample (both gates at -1.75 V). The valley contrast is estimated to be  $-0.35 \pm 0.05$  for **a** and  $-0.58 \pm 0.08$  for **b**.

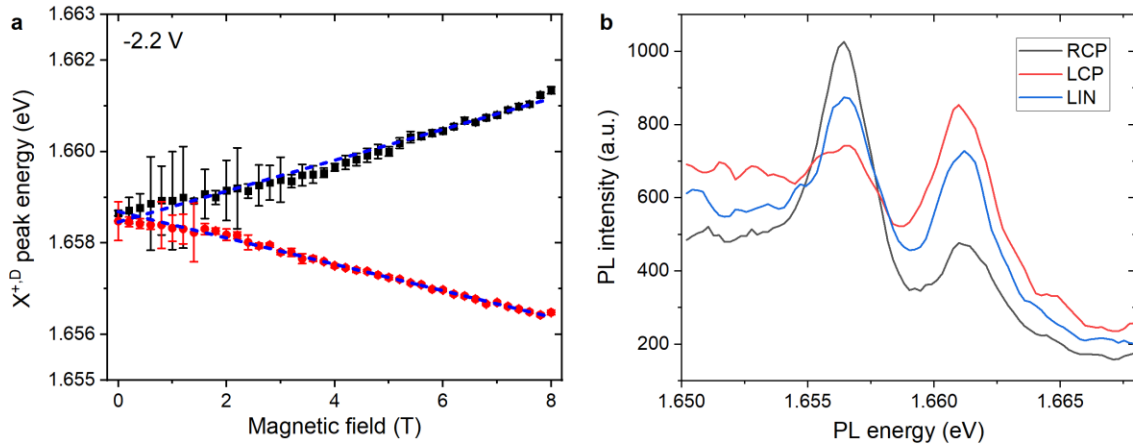

158

159

160 **Supplementary Figure 4 | Zeeman splitting of dark hole trion  $X^{+,D}$ .** **a**, The symbols  
 161 represent the peak energies of the Zeeman-split dark hole trion as a function of OP magnetic  
 162 field. The energies were determined by fitting the PL spectrum using a combination of two  
 163 Gaussian functions and a smooth background as shown in Supplementary Fig. 1. The error bars  
 164 are the fitting uncertainty. The dashed lines are linear fits, corresponding to a g-factor of  $10.9 \pm$   
 165  $0.1$ . **b**, PL spectra of the OP channel under a magnetic field of 7.8 T with RCP (black line), LCP  
 166 (red line) and linearly polarized excitation (blue line).

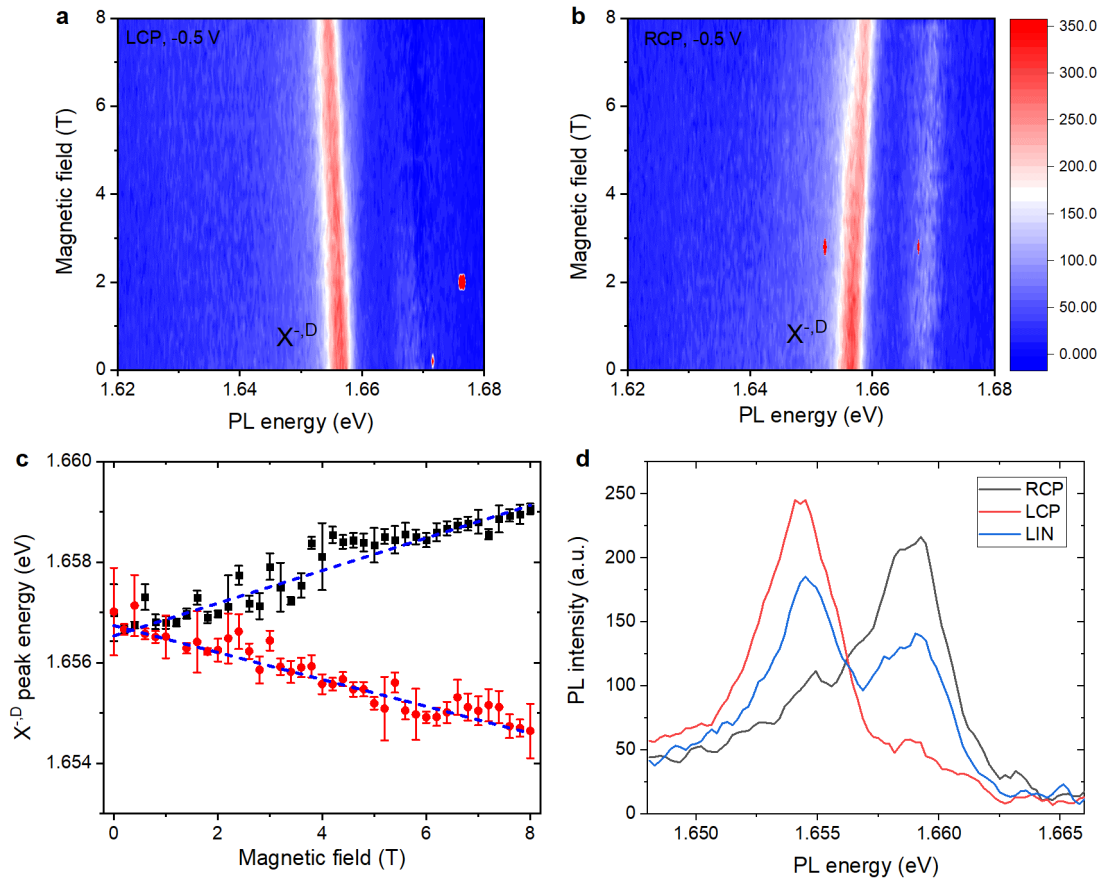

167

168

169 **Supplementary Figure 5 | Zeeman splitting of the dark electron trion  $X^{-D}$ .** **a, b**, Contour  
 170 plot of the PL spectrum of the OP channel as a function of magnetic field for an electron-doped  
 171  $WSe_2$  sample (both gates at - 0.5 V). **a** is for the LCP excitation and **b** is for the RCP excitation.  
 172 **c**, The symbols represent the peak energies of the Zeeman-split dark electron trion as a function  
 173 of OP magnetic field. Similar to Supplementary Fig. 4, the linear fit reveals a g-factor of  $10.2 \pm$   
 174  $0.3$  (blue dashed lines). **d**, PL spectra of the OP channel under a magnetic field of 8 T with RCP  
 175 (black), LCP (red) and linearly polarized excitation (blue line).

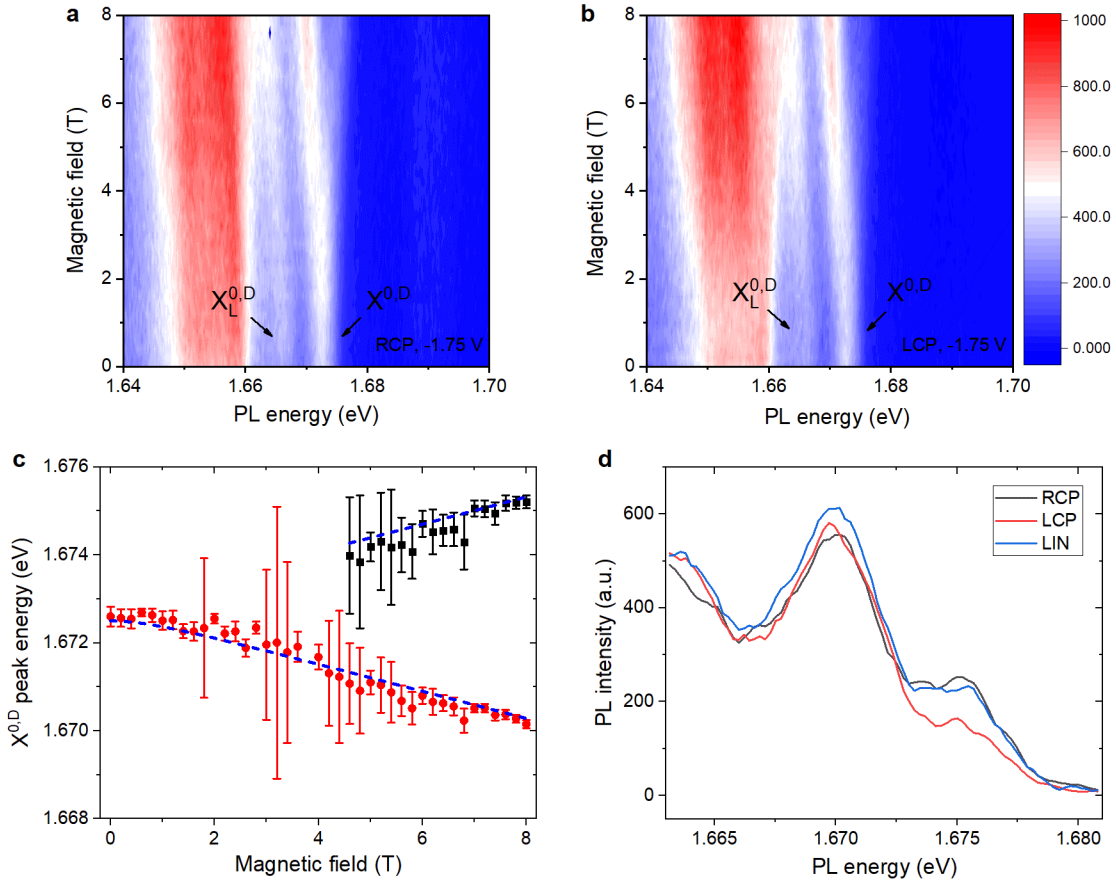

176  
177

178 **Supplementary Figure 6 | Zeeman splitting of the dark exciton  $X^{0,D}$ .** **a, b,** Contour plot of the  
 179 PL spectrum of the OP channel as a function of magnetic field for an electron-doped WSe<sub>2</sub>  
 180 sample (both gates at  $-1.75$  V). **a** is for the RCP excitation and **b** is for the LCP excitation. The  
 181 Zeeman splitting ( $\Delta E$ ) in **c** is described by  $\Delta E = \sqrt{\delta^2 + (g\mu_B B)^2}$ , where  $\delta$  is the energy  
 182 splitting at zero magnetic field and fixed at  $0.6$  meV (obtained from C. Robert et al.<sup>2</sup>). The  $g$ -  
 183 factor of neutral dark exciton is estimated to be  $10.8 \pm 0.5$ . **d,** PL spectra of the OP channel under  
 184 a magnetic field of  $8$  T with RCP (black), LCP (red) and linearly polarized excitation (blue line).



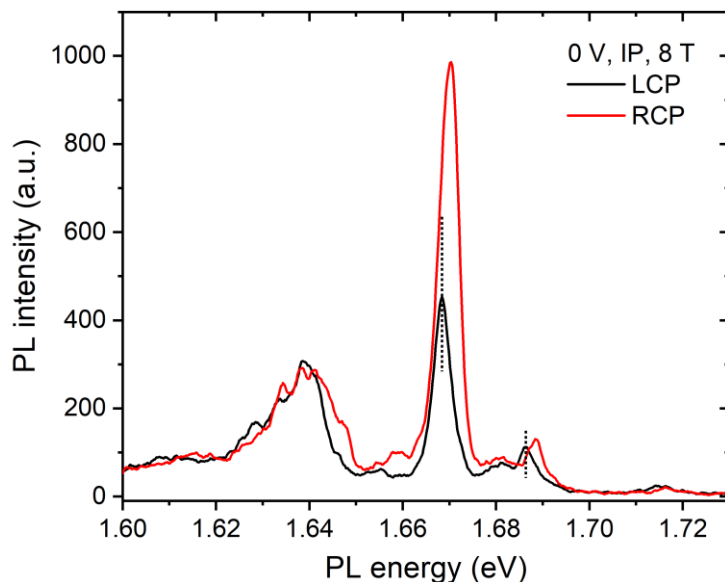

185  
186  
187  
188  
189  
190  
191  
192

**Supplementary Figure 7 | PL spectra of the IP channel under a magnetic field.** The PL spectrum of the IP channel for an electron-doped WSe<sub>2</sub> sample (both gates at 0 V) by the LCP (black) and RCP (red) excitation under 8 T. The dotted vertical lines are guides to the eye for the bright electron trion emission peaks under the LCP excitation.

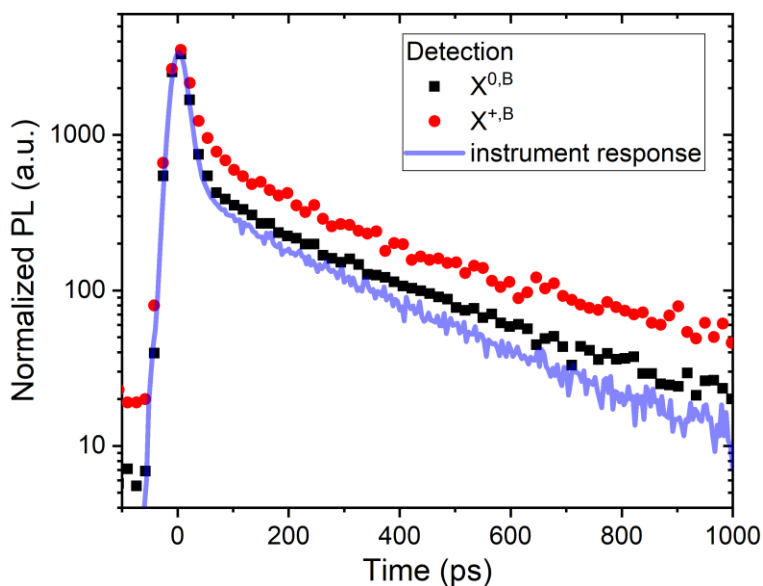

193  
194  
195  
196  
197  
198  
199

**Supplementary Figure 8 | PL dynamics of the bright excitons.** Raw data of the time-resolved PL of the bright neutral exciton (black symbols) and hole trion (red symbols) of a hole-doped WSe<sub>2</sub> sample (gate voltages at -2.2 V). The blue curve is the instrument response function obtained by measuring a fs laser pulse. All the curves have been normalized to have the same peak value.

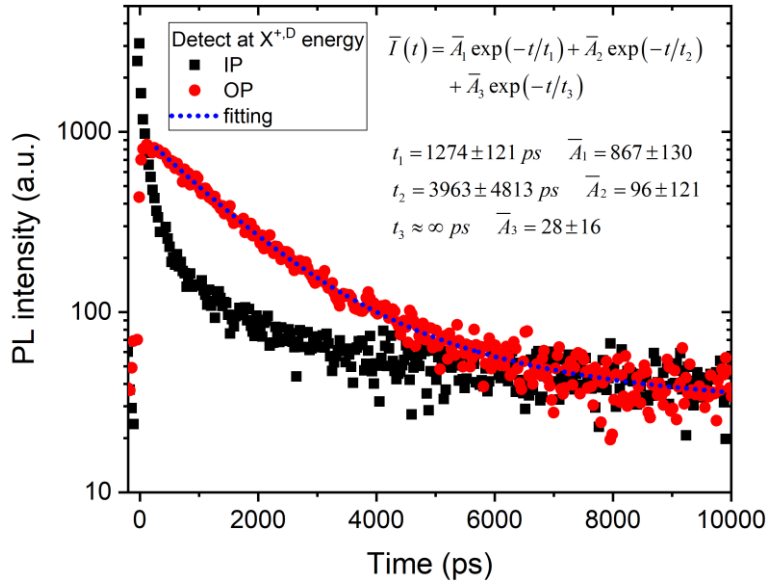

200  
 201  
 202  
 203  
 204  
 205  
 206  
 207

**Supplementary Figure 9 | PL dynamics of the dark hole trion.** Time-resolved PL at the energy of the dark hole trion in the OP (red symbols) and IP (black symbols) channel of a hole-doped WSe<sub>2</sub> sample (gate voltages at  $-2.2$  V). The data have been deconvoluted with the IRF shown in Supplementary Fig. 8. The blue dotted curve is a three-exponential fit (inset) to the OP channel result, revealing a recombination time constant of  $1.27 \pm 0.12$  ns for the fastest exponential decay component, which is likely related with the free dark hole trions.

208  
 209  
 210

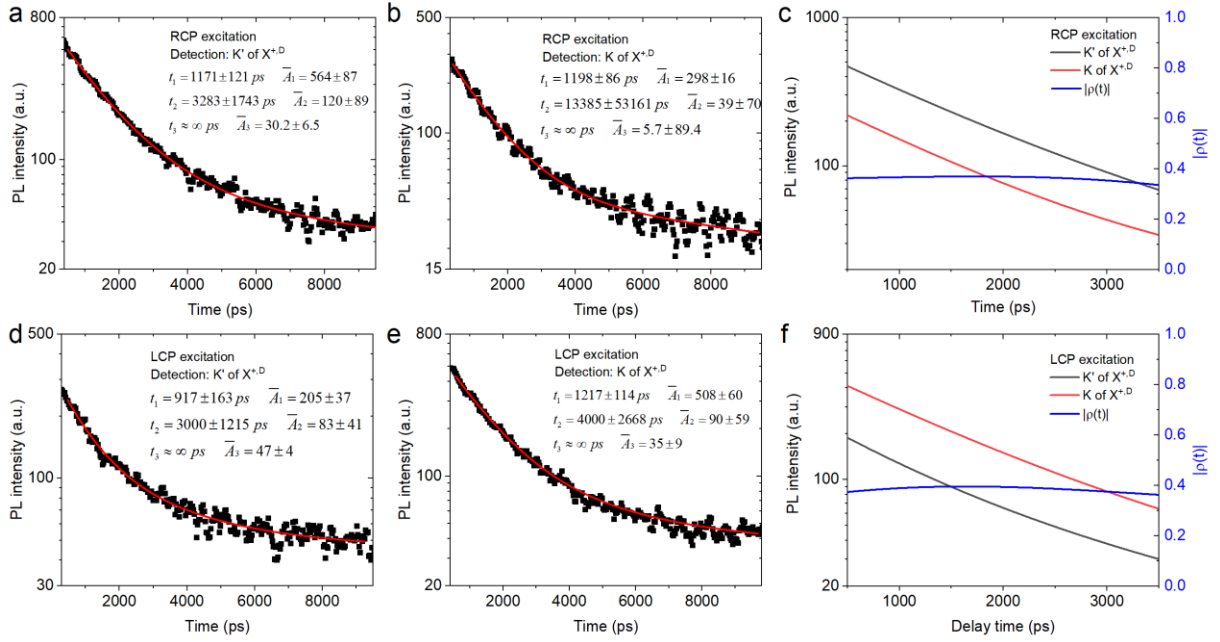

211  
212  
213  
214  
215  
216  
217  
218  
219

**Supplementary Figure 10 | Three-exponential fit of the PL dynamics of the dark hole trion.**  
**a, b, d, e,** Black symbols are experimental data. Red curves are fit as described in the  
Supplementary Note 3 for the PL dynamics from the K' and K valley state of  $X^{+,D}$  with RCP (**a,b**)  
and LCP (**d,e**) excitation. **c, f,** Black and red curves are the reconstructed PL dynamics under  
single excitation from the K' and K valley state of  $X^{+,D}$ , respectively. Blue curves are the valley  
contrast  $\rho(t)$  defined as  $\frac{I_{RCP} - I_{LCP}}{I_{RCP} + I_{LCP}}$ , calculated from the reconstructed PL dynamics. Negligible  
changes are observed within the time window of the first 3.5 ns.

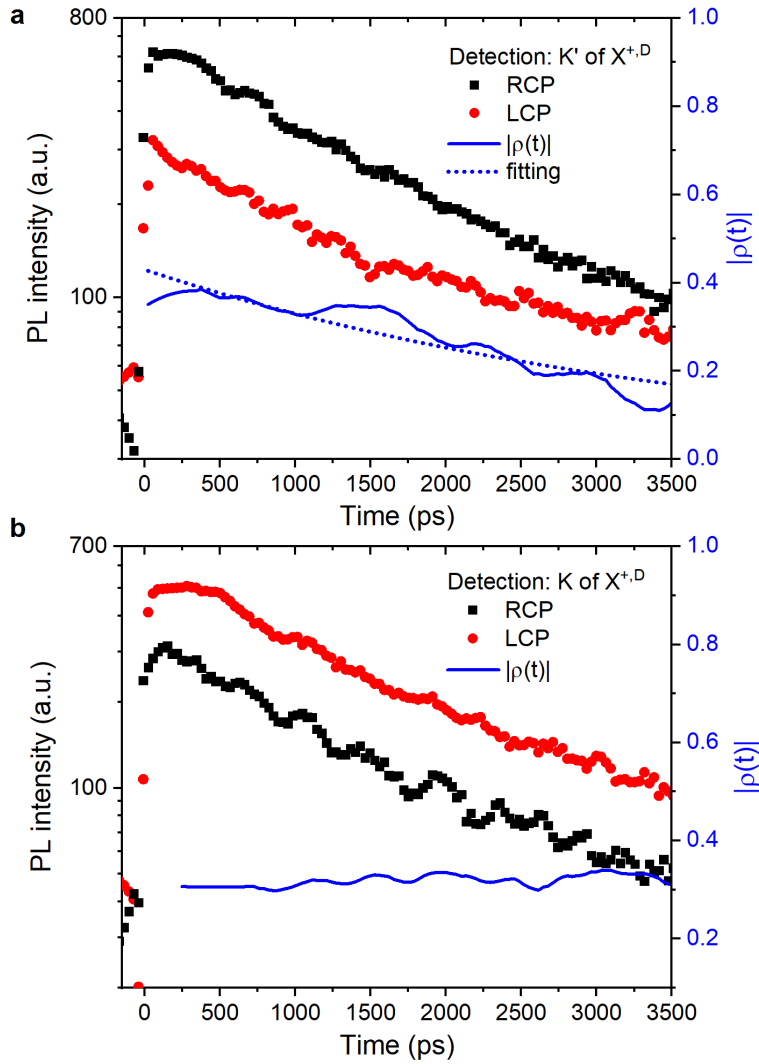

220  
221

222 **Supplementary Figure 11 | PL dynamics of the dark hole trion under 8 T (an alternative**  
 223 **method).** The time-resolved PL of a hole-doped  $\text{WSe}_2$  sample (both gates at  $-2.2$  V) is  
 224 monitored at the  $\text{K}'$  (a) and  $\text{K}$  valley (b) for the dark hole trion. The black and red symbols  
 225 represent the PL under the RCP and LCP excitations, respectively. The solid blue curves  
 226 represent the valley contrast  $\rho(t)$  defined as  $\frac{I_{\text{RCP}} - I_{\text{LCP}}}{I_{\text{RCP}} + I_{\text{LCP}}}$ , where  $I_{\text{RCP(LCP)}}$  is the PL intensity with  
 227 the RCP(LCP) excitation. The dotted blue curve in a represents a single-exponential fit to the  
 228 dynamics of  $\rho(t)$  for the first 3.5 ns, corresponding to a decay time constant of  $3.8 \pm 0.2$  ns. No  
 229 meaningful fit for the dynamics of  $\rho(t)$  in b can be obtained, as there is negligible decay.

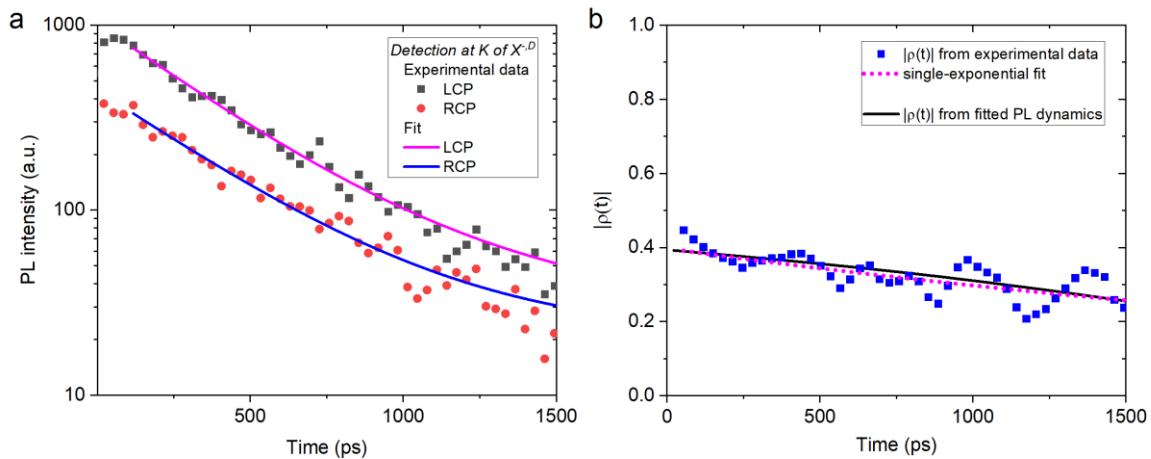

230  
 231  
 232  
 233  
 234  
 235  
 236  
 237  
 238  
 239  
 240

**Supplementary Figure 12 | Valley dynamics of the dark electron trion.** **a**, The time-resolved PL monitored at the K valley of the dark electron trion (the lower-energy peak of the Zeeman-split states) under a magnetic field of 8 T of an electron-doped WSe<sub>2</sub> sample (both gates at - 0.5 V). The black and red symbols represent the PL with the RCP and LCP excitation, respectively. The solid magenta and blue curves respectively represent three-exponential fit to the experimental data with LCP and RCP excitation. **b**, The valley contrast  $\rho(t)$  defined as  $\frac{I_{RCP}-I_{LCP}}{I_{RCP}+I_{LCP}}$ , calculated using the experimental data (symbols) and the fit functions (solid line) under LCP and RCP excitations in **a**. The dotted curve is a single-exponential fit to the symbols, revealing a decay time constant of  $3.5 \pm 0.5$  ns.

241  
 242  
 243  
 244  
 245  
 246  
 247  
 248  
 249  
 250  
 251  
 252  
 253  
 254  
 255  
 256

### Supplementary References

1. Barbone, M. *et al.* Charge-tuneable biexciton complexes in monolayer WSe<sub>2</sub>. *Nat. Commun.* **9**, 3721 (2018).
2. Robert, C. *et al.* Fine structure and lifetime of dark excitons in transition metal dichalcogenide monolayers. *Phys. Rev. B* **96**, 155423 (2017).
3. Li, Z. *et al.* Revealing the biexciton and trion-exciton complexes in BN encapsulated WSe<sub>2</sub>. *Nat. Commun.* **9**, 3719 (2018).
4. Damen, T. C., Leo, K., Shah, J. & Cunningham, J. E. Spin relaxation and thermalization of excitons in GaAs quantum wells. *Appl. Phys. Lett.* **58**, 1902–1904 (1991).
5. Muñoz, L., Pérez, E., Viña, L. & Ploog, K. Spin relaxation in intrinsic GaAs quantum wells: Influence of excitonic localization. *Phys. Rev. B* **51**, 4247–4257 (1995).
6. Roussignol, P. *et al.* Hole polarization and slow hole-spin relaxation in an n-doped quantum-well structure. *Phys. Rev. B* **46**, 7292–7295 (1992).
7. Vinattieri, A. *et al.* Exciton dynamics in GaAs quantum wells under resonant excitation. *Phys. Rev. B* **50**, 10868–10879 (1994).
